# Supplementary material for: Identification of ferroptosis-related gene signatures associated with multiple sclerosis using weighted gene co-expression network analysis
Source: PubMed Central journal article supplement — Medicine (Baltimore). 2022 Dec 23;101(51):e31802. doi: 10.1097/MD.0000000000031802 (PMC9794287; doi:10.1097/md.0000000000031802), 2022-12-23
Supplement: medi-101-e31802-s001.pdf [file medi-101-e31802-s001.pdf]

# Supplementary Materials

## **60 ferroptosis-related genes**

ACSL4, AKR1C1, AKR1C2, AKR1C3, ALOX15, ALOX5, ALOX12, ATP5MC3, CARS, CBS, CD44, CHAC1, CISD1, CS, DPP4, FANCD2, GCLC, GCLM, GLS2, GPX4, GSS, HMGCR, HSPB1, CRYAB, LPCAT3, MT1G, NCOA4, PTGS2, RPL8, SAT1, SLC7A11, FDFT1, TFRC, TP53, EMC2, AIFM2, PHKG2, HSBP1, ACO1, FTH1, STEAP3, NFS1, ACSL3, ACACA, PEBP1, ZEB1, SQLE, FADS2, NFE2L2, KEAP1, NQO1, NOX1, ABCC1, SLC1A5, GOT1, G6PD, PGD, IREB2, HMOX1, ACSF2.
